# Supplementary material for: A type I IFN–Flt3 ligand axis augments plasmacytoid dendritic cell development from common lymphoid progenitors
Source: PubMed Central journal article supplement — J Exp Med. 2013 Nov 18;210(12):2515–22. doi: 10.1084/jem.20130536 (PMC3832917; doi:10.1084/jem.20130536), 2013-11-18
Supplement: supp_jem.20130536_JEM_20130536_sm.pdf [file supp_jem.20130536_JEM_20130536_sm.pdf]

## SUPPLEMENTAL MATERIAL

Chen et al., <http://www.jem.org/cgi/content/full/jem.20130536/DC1>**Table S1.** Primer sequences

| Gene         | Forward                          | Reverse                         |
|--------------|----------------------------------|---------------------------------|
| <i>Ifna4</i> | 5'-ATGAGTGGTGGTTGCAGGC-3'        | 5'-TGACCTTCAAATGCAGTAGATTCA-3'  |
| <i>Ifit3</i> | 5'-GCTCAGCCACACCCAGCTTT-3'       | 5'-AGATCCCCTGGTACCTCACTCAT-3'   |
| <i>Oas2</i>  | 5'-GAAGGATGGCGAGTTCTTACC-3'      | 5'-GTGCTTGACCAGGCGGATG-3'       |
| <i>Tcf4</i>  | 5'-AGAAGGAACGGAGGATGG-3'         | 5'-CTGTGCTCTTCAGGTG-3'          |
| <i>Rag1</i>  | 5'-GGCTAGGGTCAGCAGCAAGGA-3'      | 5'-CACGGGATCAGCCAGAATGTGTTTC-3' |
| <i>Id2</i>   | 5'-AACATGAACGACTGCTACTC-3'       | 5'-CTGACGATAGTGGGATGC-3'        |
| <i>Actb</i>  | 5'-AGGTGTGCACCTTTTATTGGTCTCAA-3' | 5'-TGTATGAAGATTTGGTCTCCCT-3'    |

All primers are designed using Beacon Designer.
